# Supplementary material
Source: PubMed Central journal article supplement (PMC2638808)

Auxin raw SI value

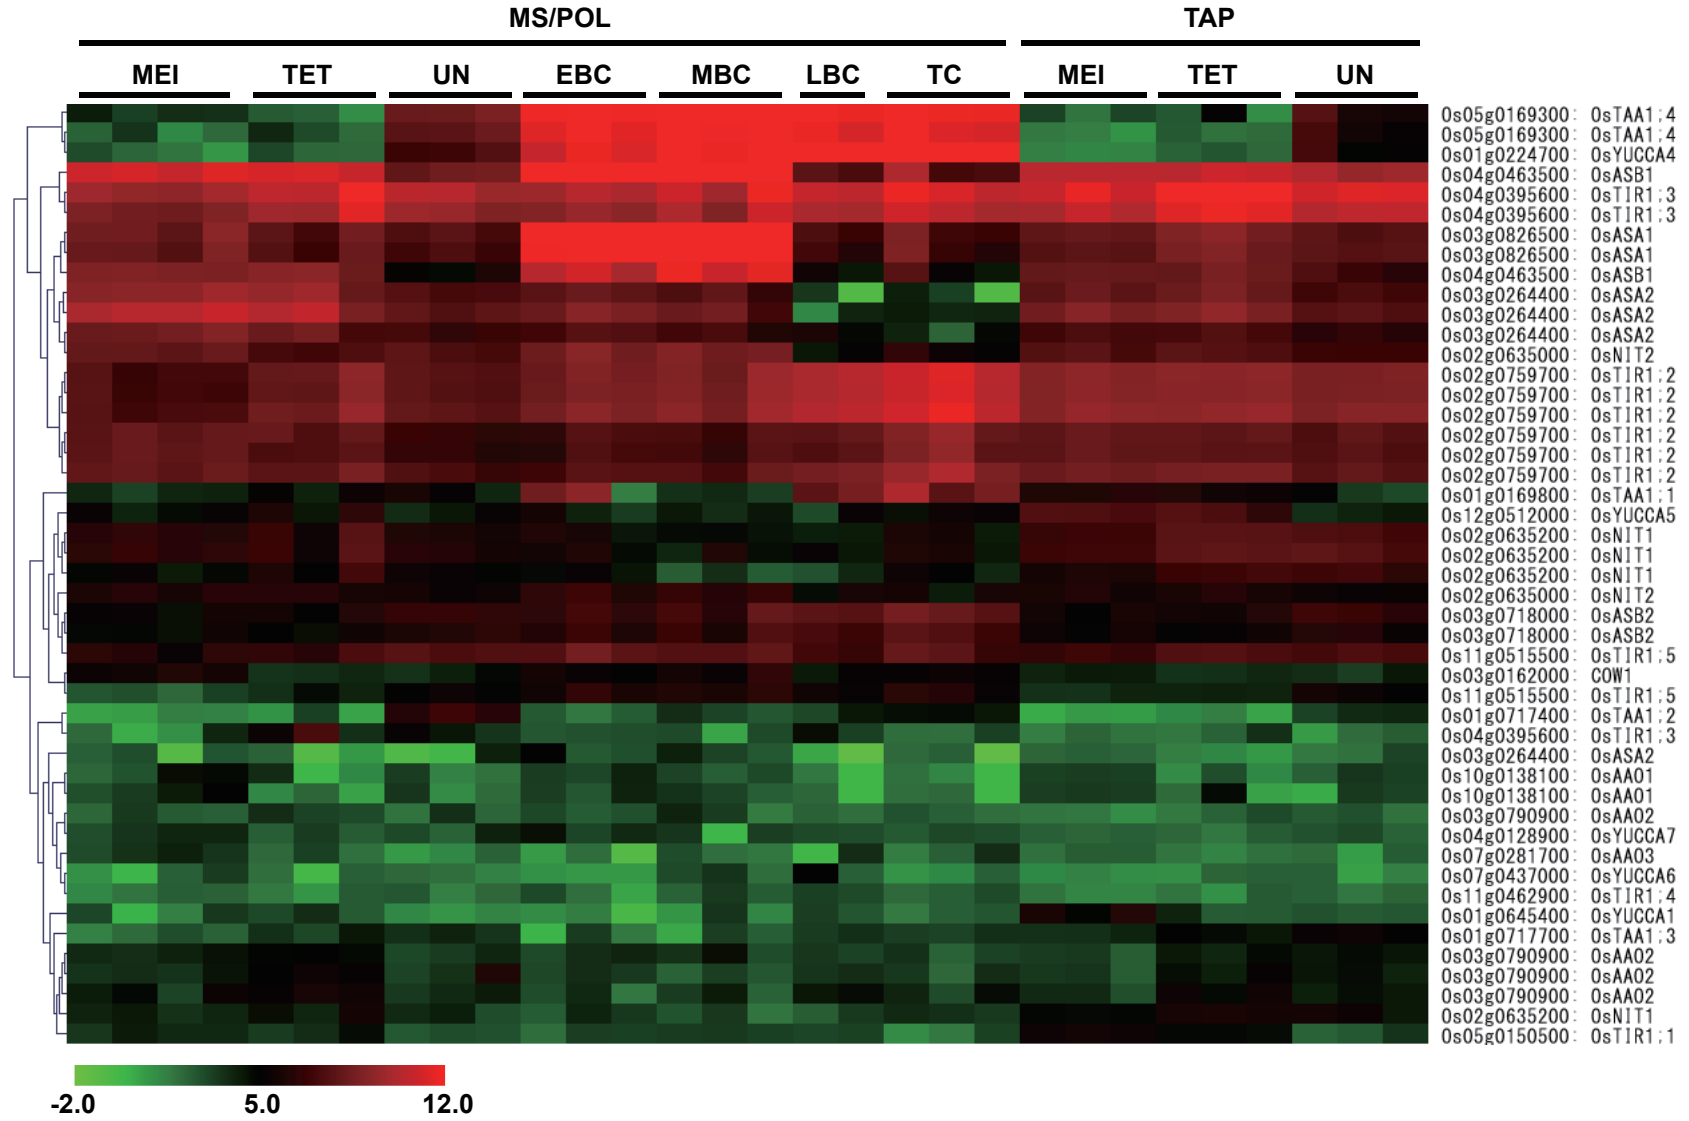

Supplemental Figure 2.

Supplement: pcn123_2.pdf [file pcn123_2.pdf]

CK Z-value

MS/POL

TAP

MEI

TET

UN

EBC

MBC

LBC

TC

MEI

TET

UN

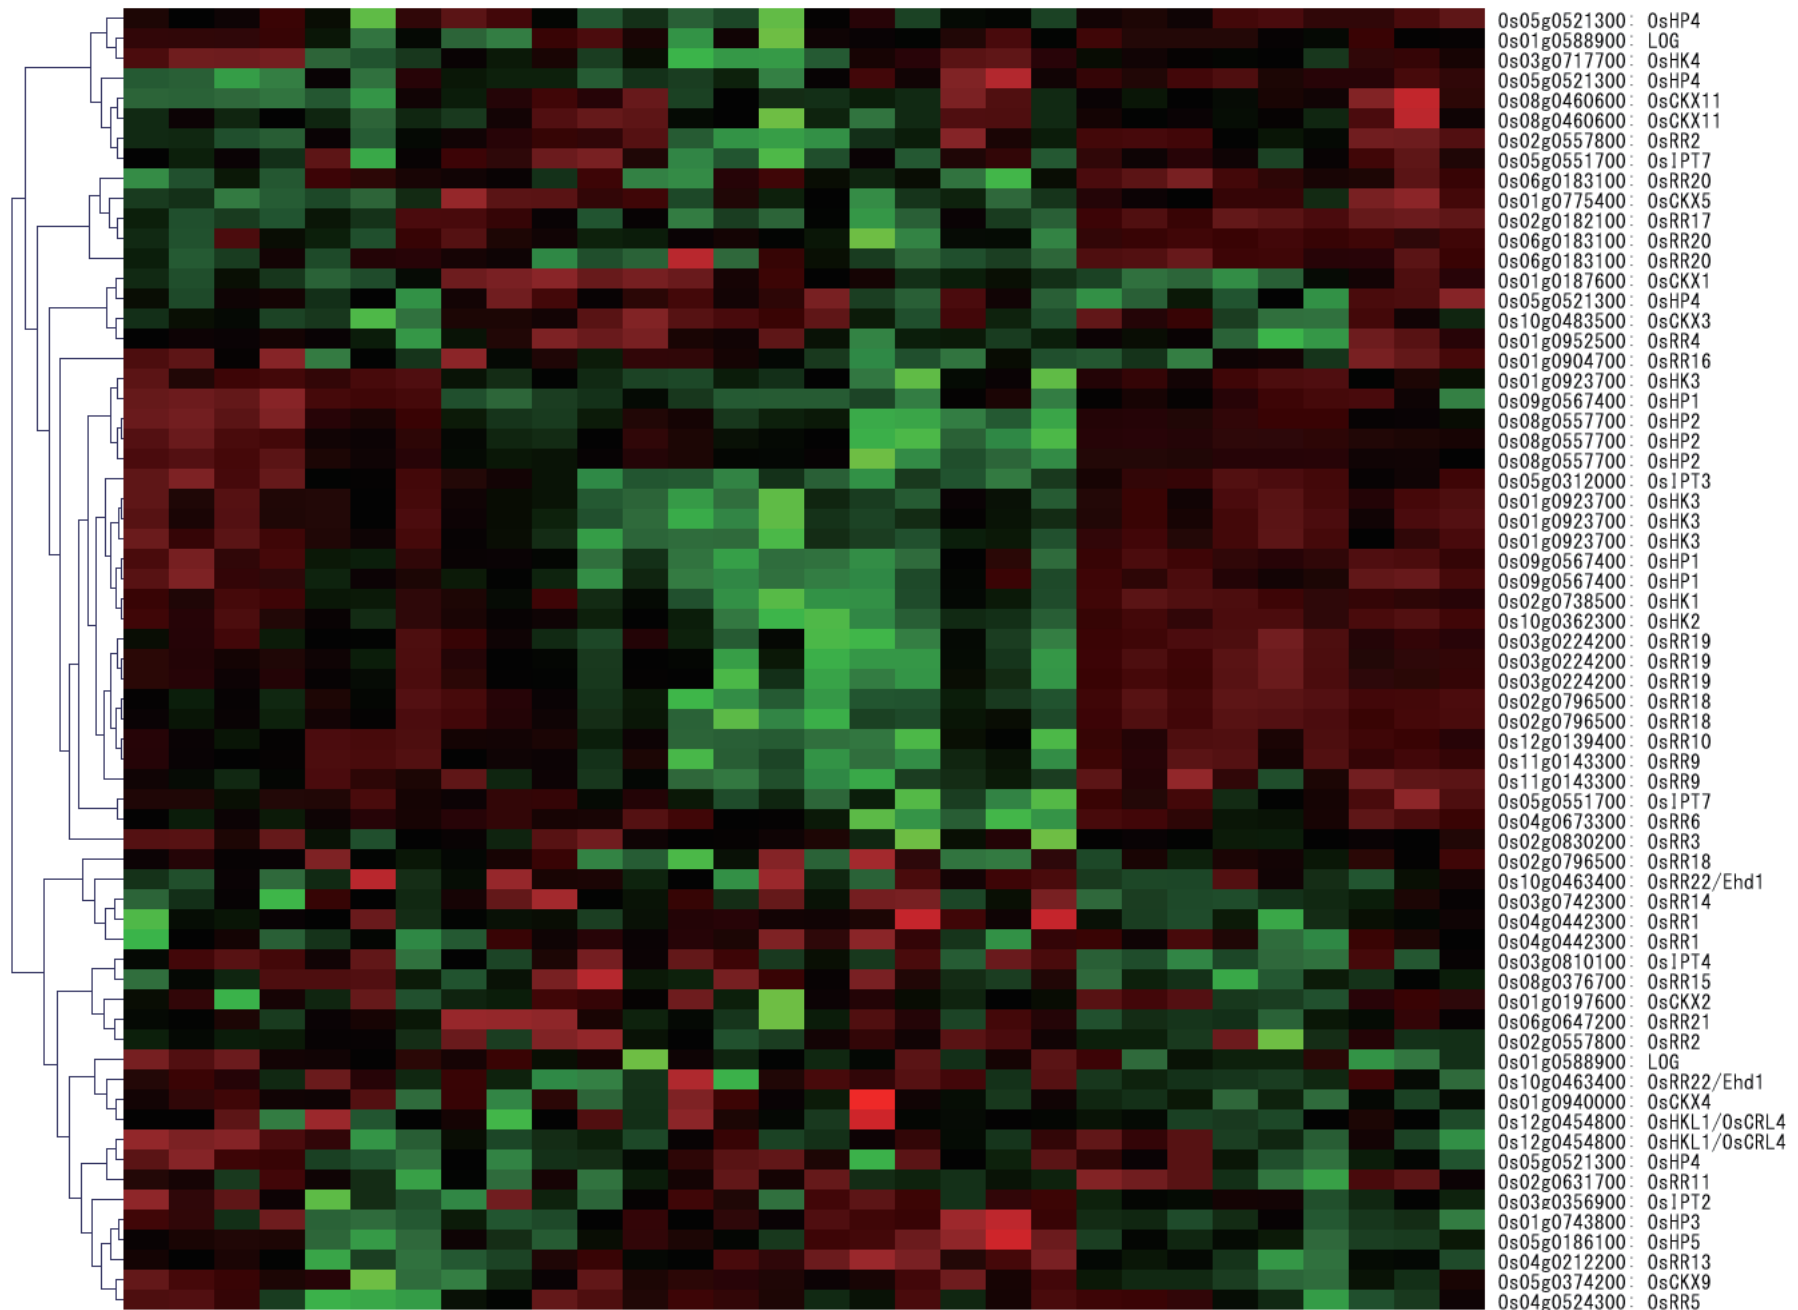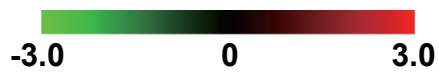

Supplemental Figure 4.

Supplement: pcn123_4.pdf [file pcn123_4.pdf]

Ethylene raw SI value

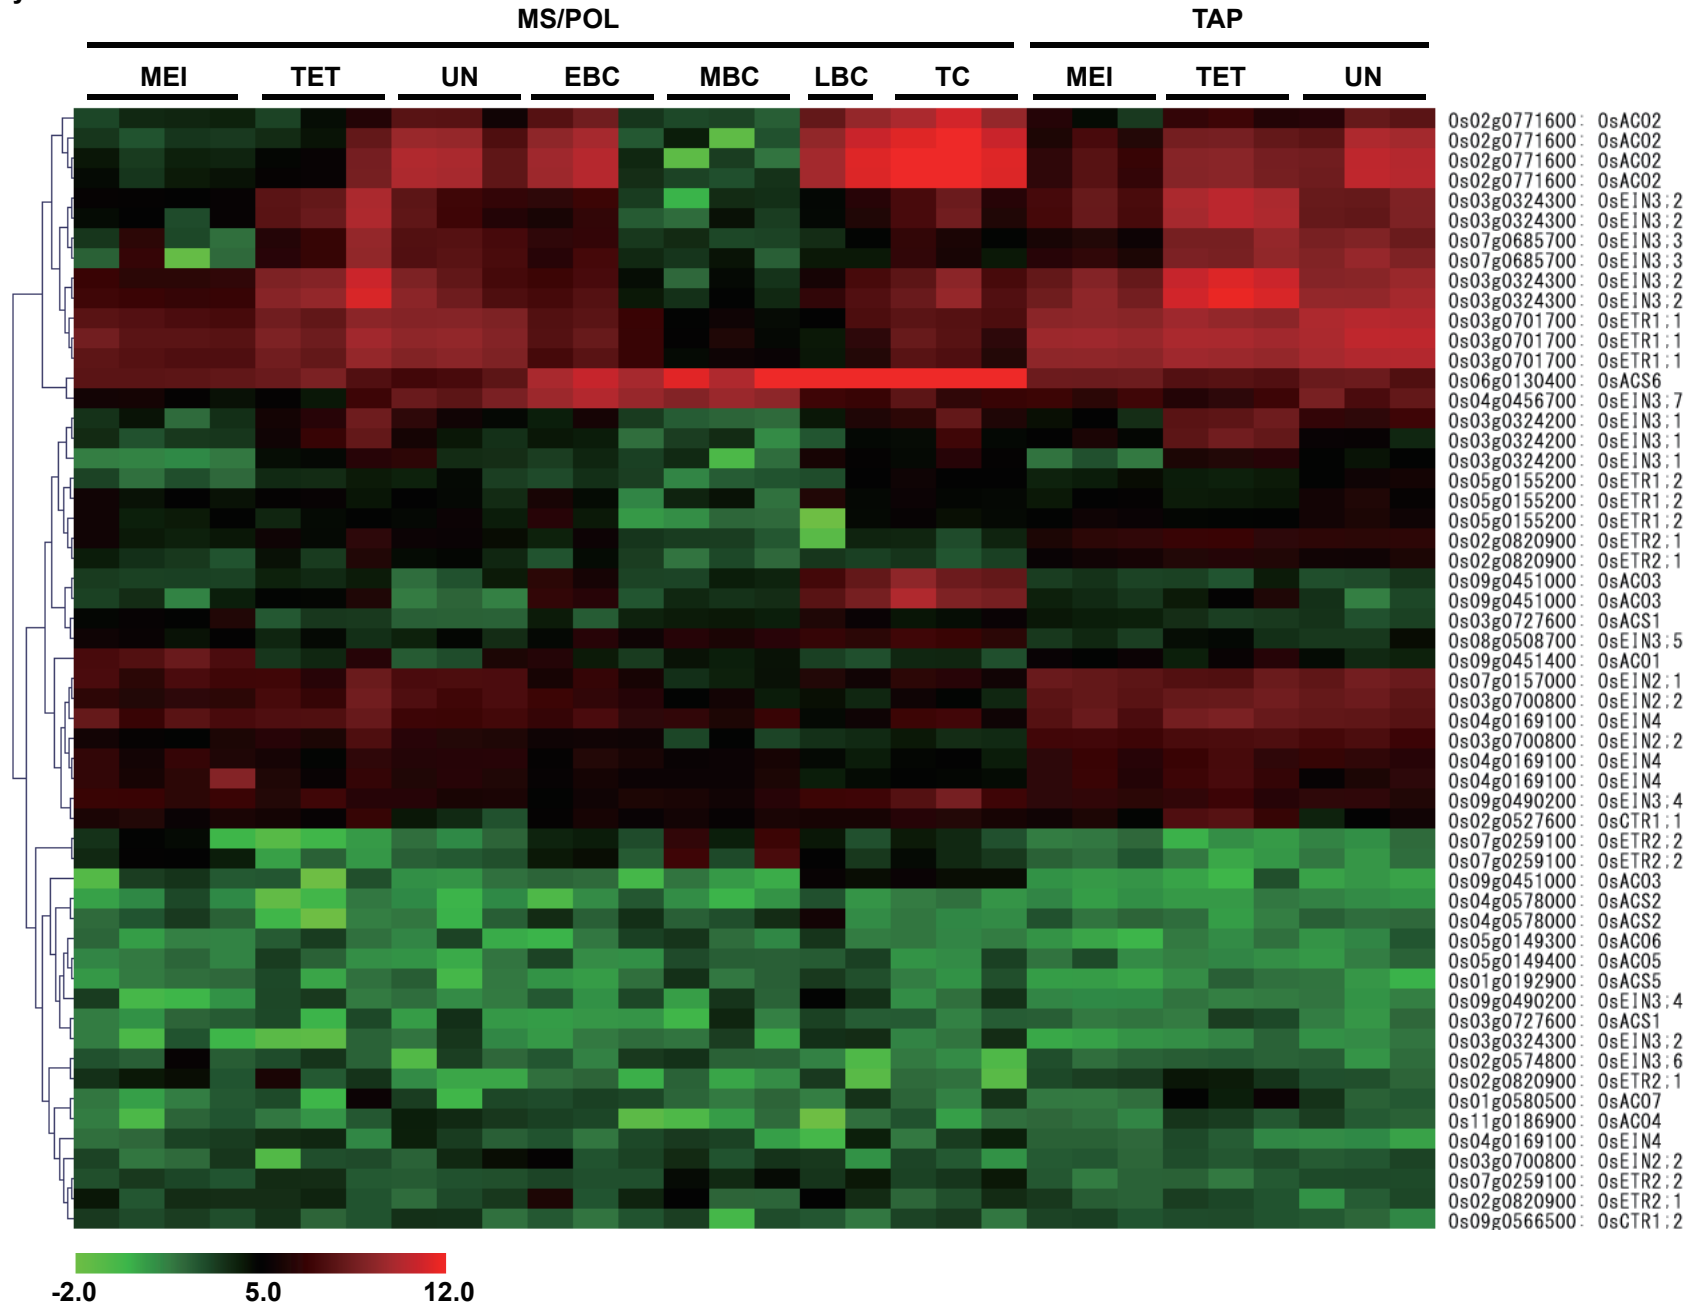

Supplemental Figure 9.

Supplement: pcn123_9.pdf [file pcn123_9.pdf]
